# Supplementary material for: Platinum-supporting hollandite-type vanadium–chromium mixed oxides as efficient heterogeneous catalysts for deoxygenation of sulfoxides under atmospheric H2 pressure
Source: Royal Society of Chemistry journal article supplement (doi:10.1039/c7cy00547d), 2017-01-01
Supplement: c7cy00547d1.pdf [file c7cy00547d1.pdf]

*Electronic supplementary information (ESI) for*

## **Platinum-supporting hollandite-type vanadium–chromium mixed oxides as efficient heterogeneous catalysts for deoxygenation of sulfoxides under atmospheric H<sub>2</sub> pressure**

Tsubasa Uematsu, Yoshiyuki Ogasawara, Kosuke Suzuki, Kazuya Yamaguchi\* and Noritaka Mizuno\*

Department of Applied Chemistry, School of Engineering, The University of Tokyo,  
7-3-1 Hongo, Bunkyo-ku, Tokyo 113-8656, Japan.

E-mail: kyama@appchem.t.u-tokyo.ac.jp, tmizuno@mail.ecc.u-tokyo.ac.jp

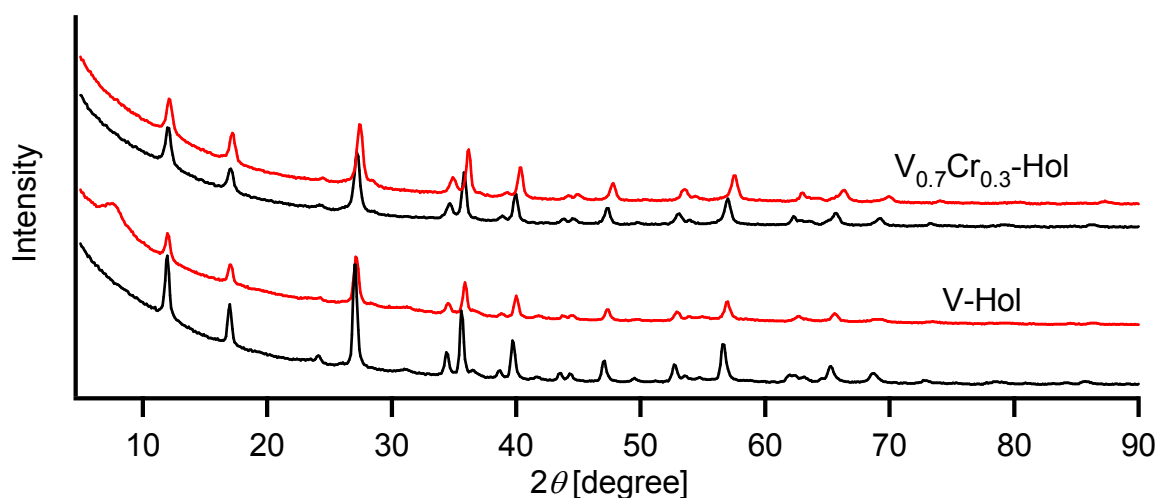

**Fig. S1** XRD patterns of as-prepared V-Hol and V<sub>0.7</sub>Cr<sub>0.3</sub>-Hol (black lines), and the patterns of the retrieved V-Hol and V<sub>0.7</sub>Cr<sub>0.3</sub>-Hol after the deoxygenation of **1a** using DMF solvent (red lines). Reaction conditions: V-Hol or V<sub>0.7</sub>Cr<sub>0.3</sub>-Hol (30 mg), **1a** (0.5 mmol), DMF (1 mL), Ar (1 atm), 100°C, 24 h.

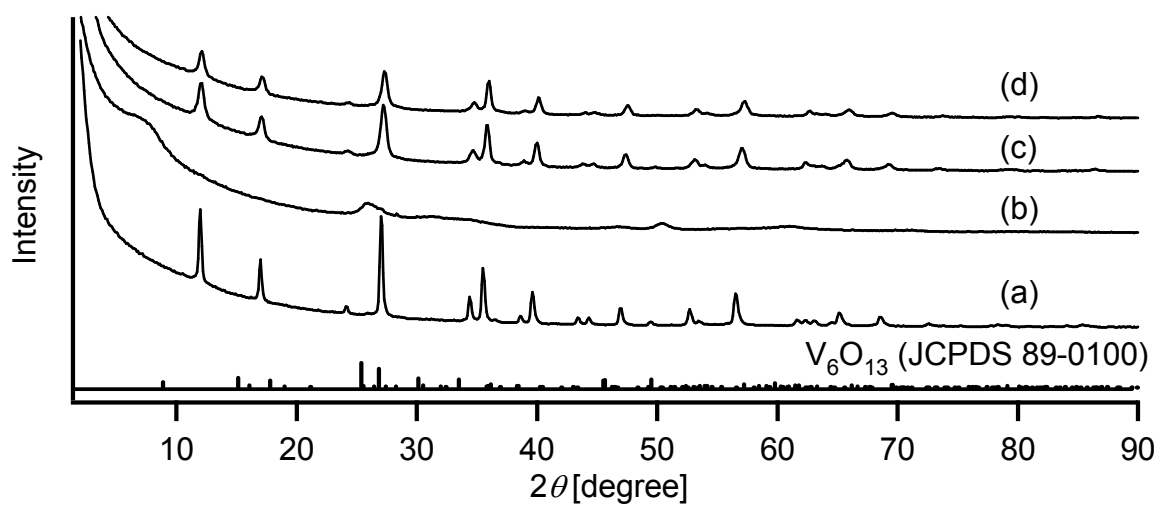

**Fig. S2** XRD patterns of (a) V-Hol, (b) Pt/V-Hol, (c)  $V_{0.7}Cr_{0.3}$ -Hol, and (d) Pt/ $V_{0.7}Cr_{0.3}$ -Hol.

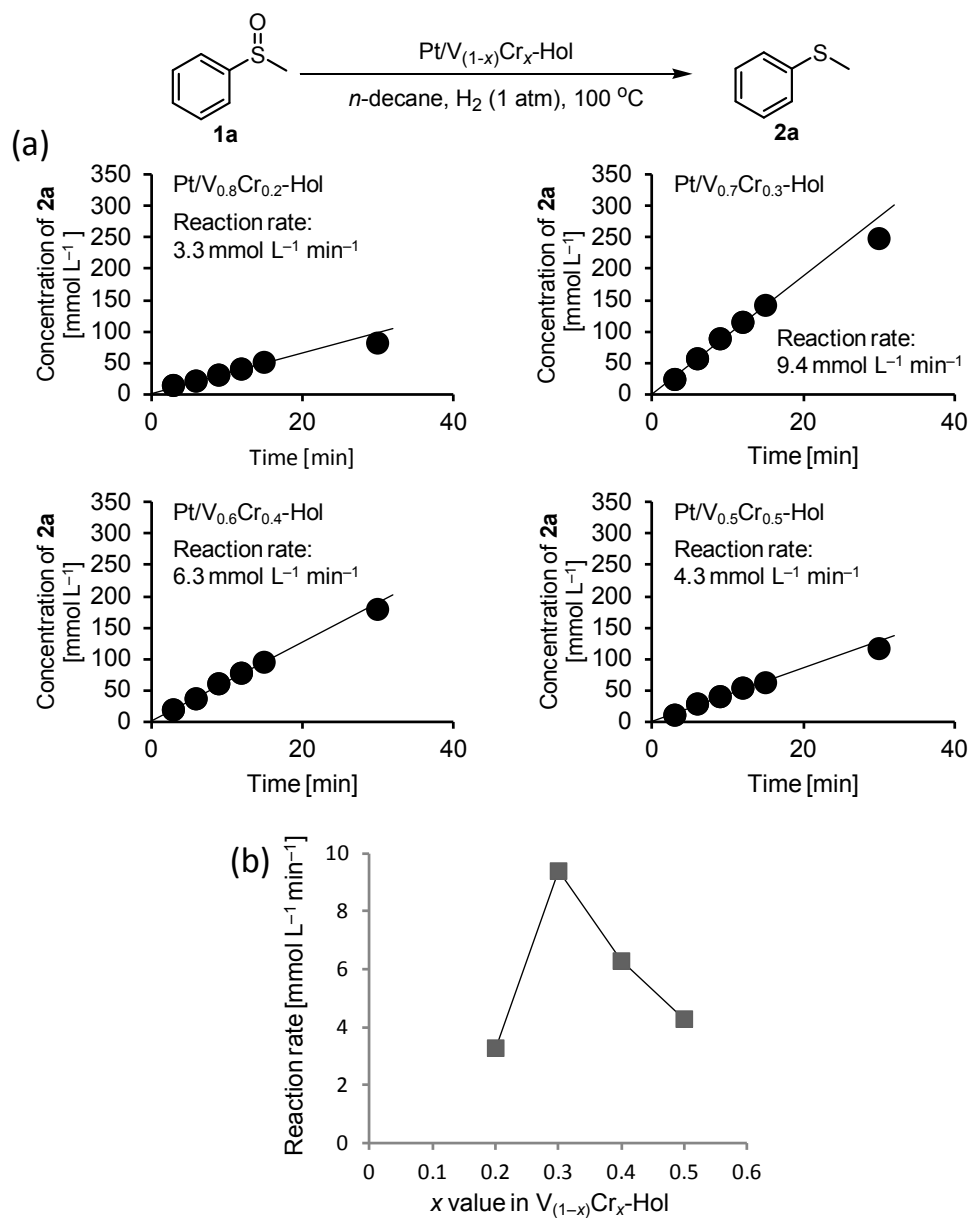

**Fig. S3** (a) Reaction profiles and reaction rate of the deoxygenation of **1a** using Pt/V<sub>(1-x)</sub>Cr<sub>x</sub>-Hol and (b) relationship between the chromium contents and the reaction rates. Reaction conditions: Pt/V<sub>(1-x)</sub>Cr<sub>x</sub>-Hol, (30 mg), **1a** (0.5 mmol), *n*-decane (1 mL), H<sub>2</sub> (1 atm), 100°C. Catalysts were pretreated under 1 atm H<sub>2</sub> at 150°C. Yields were determined by GC analysis using naphthalene as an internal standard.

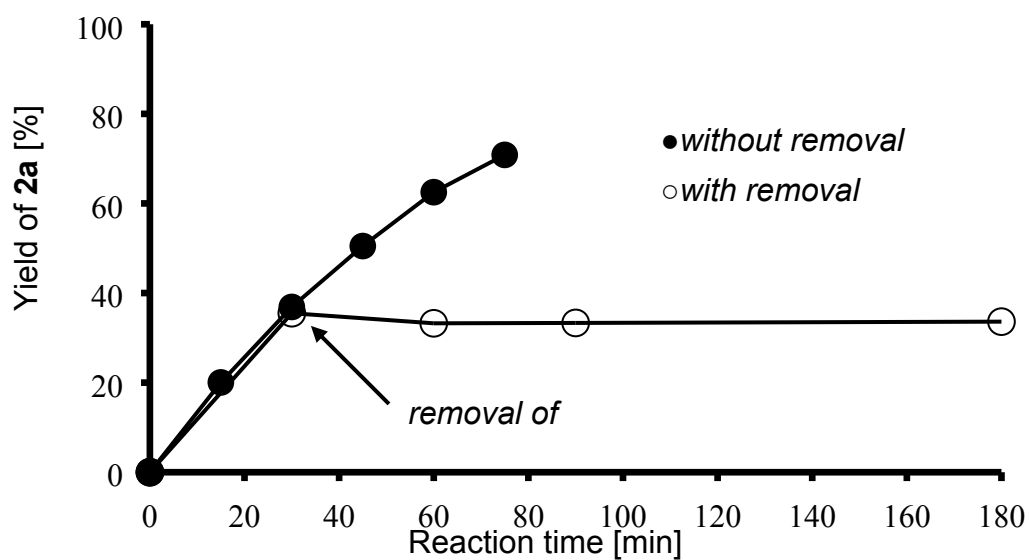

**Fig. S4** Effect of removal of Pt/V<sub>0.7</sub>Cr<sub>0.3</sub>-Hol on the deoxygenation of **1a**; without (●) or with removal of Pt/V<sub>0.7</sub>Cr<sub>0.3</sub>-Hol (○). The arrow indicates the removal of Pt/V<sub>0.7</sub>Cr<sub>0.3</sub>-Hol. Reaction conditions: Pt/V<sub>0.7</sub>Cr<sub>0.3</sub>-Hol (30 mg), **1a** (0.5 mmol), *n*-decane (1 mL), 100°C, H<sub>2</sub> (1 atm). Catalysts were pretreated under 1 atm H<sub>2</sub> at 150°C for 30 min. Yields were determined by GC analysis using naphthalene as an internal standard.

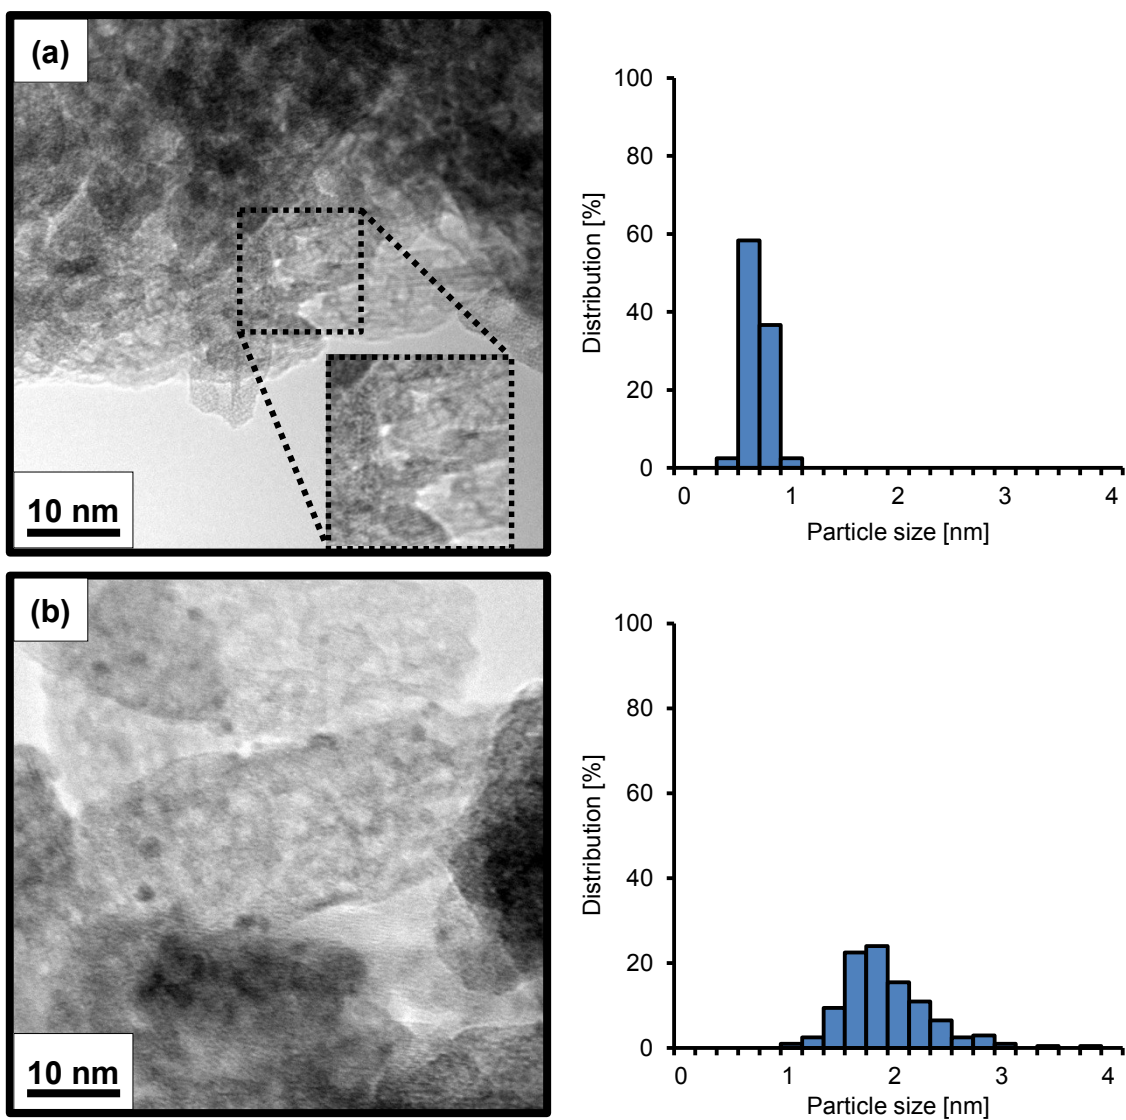

**Fig. S5** TEM images and Pt particle size distributions of (a) as-prepared Pt/V<sub>0.7</sub>Cr<sub>0.3</sub>-Hol (mean diameter: 0.6 nm,  $\sigma = 0.1$  nm) and (b) Pt/V<sub>0.7</sub>Cr<sub>0.3</sub>-Hol retrieved after the deoxygenation of **1a** under the conditions described in Fig. 7 (mean diameter: 1.8 nm,  $\sigma = 0.4$  nm). The size distributions were determined using 200 particles.

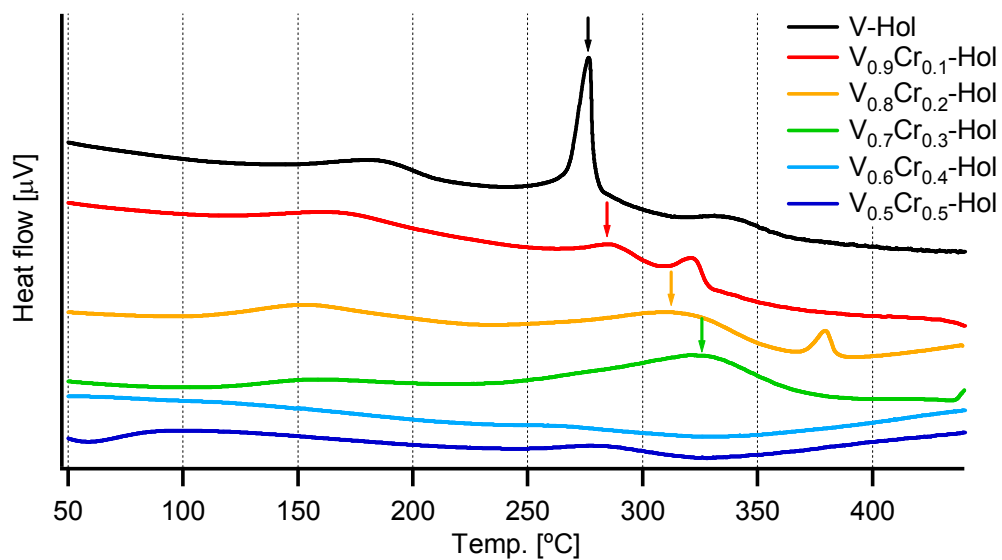

**Fig. S6** DTA profiles of V-Hol and  $V_{(1-x)}Cr_x$ -Hol samples. DTA profiles were measured under air atmosphere. The arrows indicate the decomposition temperatures of their hollandite structures.
